# Supplementary material
Source: MDPI journal article supplement (https://www.mdpi.com/1996-1073/10/8/1215)
Supplement: s1 [file s1]

*Electronic Supplementary Information for*

# Studies on the Effect of Nano-Sized MgO in Magnesium-Ion Conducting Gel Polymer Electrolyte for Rechargeable Magnesium Batteries

Na Wu <sup>1,\*</sup>, Wei Wang <sup>1</sup>, Yu Wei <sup>1,\*</sup>, and Taohai Li <sup>2,\*</sup>

<sup>1</sup> Key Laboratory of Inorganic Nanomaterials of Hebei Province, College of Chemistry and Material Science, Hebei Advance Thin Films Laboratory, College of Physical Science and Information Engineering, National Demonstration Center for Experimental Chemistry Education, Hebei Normal University, Shijiazhuang 050024, China; limingcww@163.com

<sup>2</sup> Key Lab of Environment Friendly Chemistry and Application in Ministry of Education, College of Chemistry, Xiangtan University, Xiangtan 411105, China

\* Correspondence: willywu@hebtu.edu.cn (N.W.); weiyu@mail.hebtu.cn (Y.W.); hnlth@xtu.edu.cn (T.L.); Tel.: +86-311-80787433

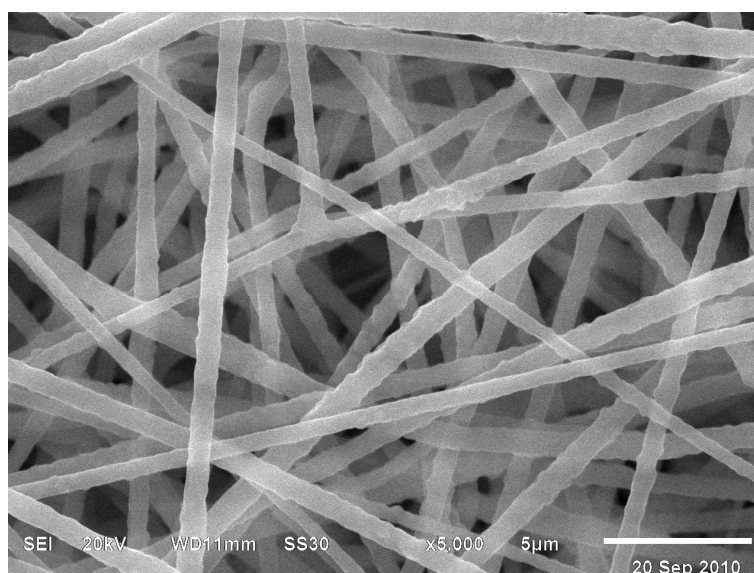

**Figure S1.** The SEM image of electrospun TPU-PVdF membranes with 5 wt% nano-sized MgO.

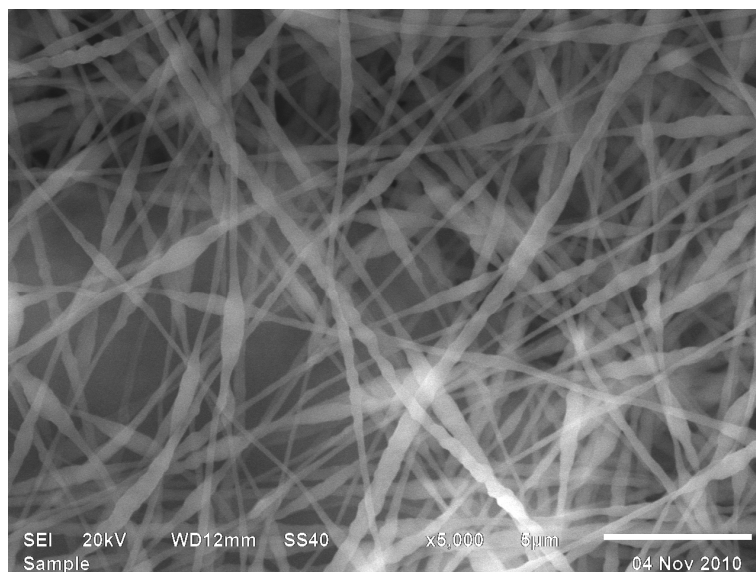

**Figure S2.** The SEM image of electrospun TPU-PVdF membranes with 10wt% nano-sized MgO.

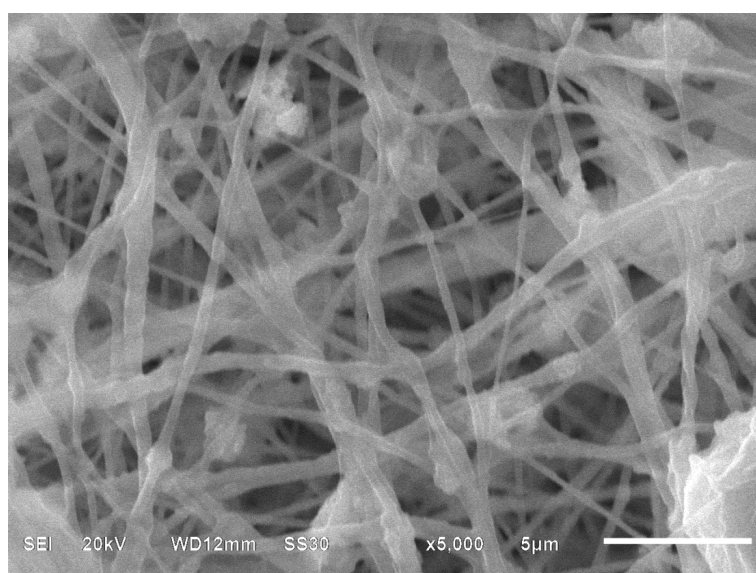

**Figure S3.** The SEM image of electrospun TPU-PVdF membranes with 15wt% nano-sized MgO.

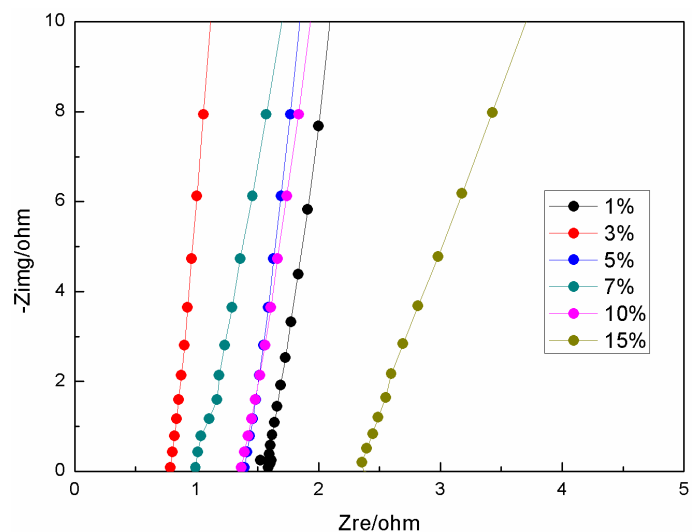

**Figure S4.** The typical Nyquist plots of EIS measurements of the GPEs with different MgO contents.

**Table S1.** Crystallinity ( $\chi_c$ ), Porosity and Mechanical properties of TPU-PVdF fibrous membranes with different content of MgO.

| Sample name       | Surface area (cm <sup>2</sup> ) | Porosity (%) | $\Delta H_f$ (J/g) | $\chi_c$ (%) | Tensile strength (MPa) | Elongation at break (%) |
|-------------------|---------------------------------|--------------|--------------------|--------------|------------------------|-------------------------|
| TPU/PVdF/MgO(0%)  | 2.726                           | 86           | 22.86              | 43.67        | 6.7 ± 0.1              | 85.7 ± 0.2              |
| TPU/PVdF/MgO(1%)  | 2.695                           | 90           | 18.07              | 34.52        | 6.9 ± 0.2              | 96.2 ± 0.1              |
| TPU/PVdF/MgO(3%)  | 2.683                           | 92           | 15.16              | 28.96        | 8.7 ± 0.1              | 111.4 ± 0.1             |
| TPU/PVdF/MgO(5%)  | 2.719                           | 95           | 13.93              | 26.61        | 8.1 ± 0.2              | 93.2 ± 0.1              |
| TPU/PVdF/MgO(7%)  | 2.698                           | 98           | 11.25              | 21.49        | 9.7 ± 0.1              | 91.7 ± 0.2              |
| TPU/PVdF/MgO(10%) | 2.701                           | 94           | 9.83               | 18.78        | 8.7 ± 0.2              | 79.3 ± 0.2              |
| TPU/PVdF/MgO(15%) | 2.692                           | 89           | 7.52               | 14.36        | 13.4 ± 0.1             | 40.7 ± 0.1              |
